# Supplementary figures and images for: Circuit mechanisms of GPe pauses account for adaptive exploration
Source: Research Square preprint supplement (doi:10.21203/rs.3.rs-7117998/v1), 2025-08-05

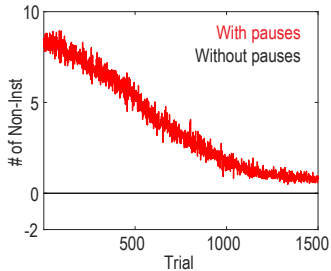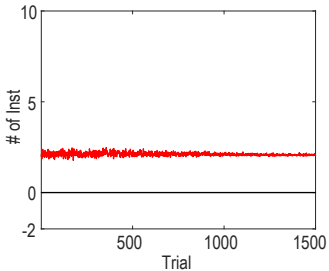

Supplement: Supplementary file 1 [file 3d08c9cd9a93f667ebfd5954.pdf]

Early

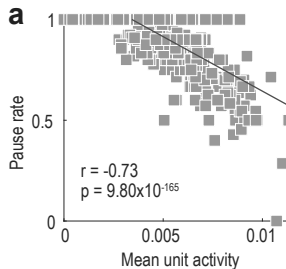

Middle

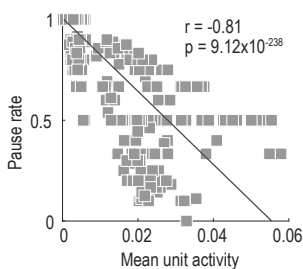

Late

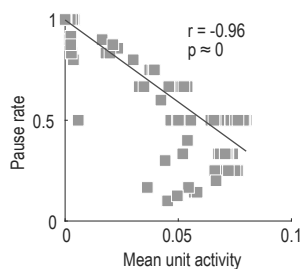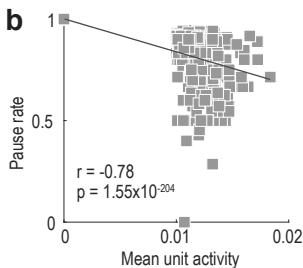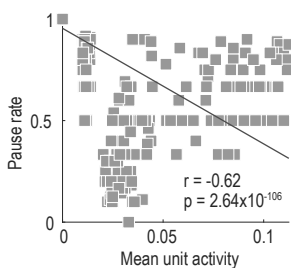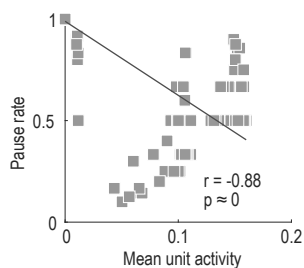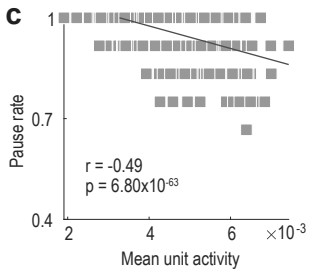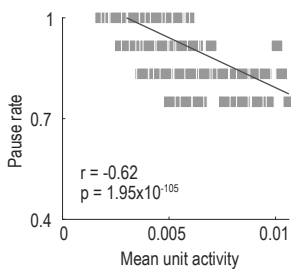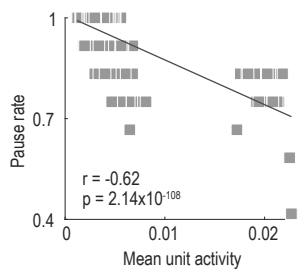

Supplement: Supplementary file 3 [file 8deed83c41dba89ad8fb0f40.pdf]
